# Supplementary material for: History and dynamics of Fennoscandian Ice Sheet retreat, contemporary ice-dammed lake evolution, and faulting in the Torneträsk area, northwestern Sweden
Source: Copernicus journal article supplement (doi:10.5194/tc-19-347-2025), 2025-01-28
Supplement: Supplementary file 1 [file tc-19-347-2025-supplement.zip]

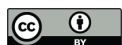

*Supplement of*

**History and dynamics of Fennoscandian Ice Sheet retreat,  
contemporary ice-dammed lake evolution, and faulting in the  
Torneträsk area, northwestern Sweden**

**Karlijn Ploeg and Arjen P. Stroeven**

*Correspondence to:* Karlijn Ploeg ([karlijnploeg@gmail.com](mailto:karlijnploeg@gmail.com))

- [tc-19-347-2025-supplement-title-page.pdf](#)
- [Fig. S1.png](#)

The copyright of individual parts of the supplement might differ from the article licence.
